# Supplementary material for: A Prospective, Randomized, Placebo-Controlled Study Assessing the Efficacy of Chinese Herbal Medicine (Huangqi Guizhi Wuwu Decoction) in the Treatment of Albumin-Bound Paclitaxel-Induced Peripheral Neuropathy
Source: MDPI journal article supplement (doi:10.3390/jcm12020505), 2023-01-07
Supplement: s1 [file s1]

**Supplemental Table S1.** QLQ-CIPN20 items (1) (2)

|                                                                                                                                          |
|------------------------------------------------------------------------------------------------------------------------------------------|
| 1. Did you have tingling fingers or hands? <sup>a</sup>                                                                                  |
| 2. Did you have tingling toes or feet? <sup>a</sup>                                                                                      |
| 3. Did you have numbness in your fingers or hands? <sup>a</sup>                                                                          |
| 4. Did you have numbness in your toes or feet? <sup>a</sup>                                                                              |
| 5. Did you have shooting or burning pain in your fingers or hands? <sup>a</sup>                                                          |
| 6. Did you have shooting or burning pain in your toes or feet? <sup>a</sup>                                                              |
| 7. Did you have cramps in your hands? <sup>b</sup>                                                                                       |
| 8. Did you have cramps in your feet? <sup>b</sup>                                                                                        |
| 9. Did you have problems standing or walking because of difficulty feeling the ground under your feet? <sup>a</sup>                      |
| 10. Did you have difficulty distinguishing between hot and cold water? <sup>a</sup>                                                      |
| 11. Did you have a problem holding a pen, which made writing difficult? <sup>b</sup>                                                     |
| 12. Did you have difficulty manipulating small objects with your fingers (for example, fastening small buttons)? <sup>b</sup>            |
| 13. Did you have difficulty opening a jar or bottle because of weakness in your hands? <sup>b</sup>                                      |
| 14. Did you have difficulty walking because your feet dropped downwards? <sup>b</sup>                                                    |
| 15. Did you have difficulty climbing stairs or getting up out of a chair because of weakness in your legs? <sup>b</sup>                  |
| 16. Were you dizzy when standing up from a sitting or lying position? <sup>c</sup>                                                       |
| 17. Did you have blurred vision? <sup>c</sup>                                                                                            |
| 18. Did you have difficulty hearing? <sup>a</sup>                                                                                        |
| 19. Please answer the following question only if you drive a car: Did you have difficulty using the pedals? <sup>b</sup>                 |
| 20. Please answer the following question only if you are a man: Did you have difficulty getting or maintaining an erection? <sup>c</sup> |

Items have been renumbered from the original QLQ-CIPN20 instrument

<sup>a</sup> Sensory scale items

<sup>b</sup> Motor scale items

<sup>c</sup> Autonomic scale items

## References:

1. Postma TJ, Aaronson NK, Heimans JJ, Muller MJ, Hildebrand JG, Delattre JY, et al. The development of an EORTC quality of life questionnaire to assess chemotherapy-induced peripheral neuropathy: the QLQ-CIPN20. *Eur J Cancer* (2005) 41(8):1135-9. doi: 10.1016/j.ejca.2005.02.012. PubMed PMID: 15911236.
2. Lavoie SE, Barton DL, Qin R, Steen PD, Aaronson NK, Loprinzi CL. Assessing patient-reported peripheral neuropathy: the reliability and validity of the European Organization for Research and Treatment of Cancer QLQ-CIPN20 Questionnaire. *Qual Life Res* (2013) 22(10):2787-99. doi: 10.1007/s11136-013-0379-8. PubMed PMID: 23543373.
